# Supplementary material for: Hydrogenation-induced large-gap quantum-spin-Hall insulator states in a germanium–tin dumbbell structure
Source: Royal Society of Chemistry journal article supplement (doi:10.1039/c5ra10712a), 2015-01-01
Supplement: c5ra10712a1.pdf [file c5ra10712a1.pdf]

Supplementary Information for  
“Hydrogenation-Induced Large-Gap Quantum-Spin-Hall Insulator  
States in Germanium-Tin Dumbbell Structure”

Xin Chen, Linyang Li, Mingwen Zhao\*

*School of Physics and State Key Laboratory of Crystal Materials, Shandong*

*University, Jinan, Shandong, 250100, China*

E-mail: [zmw@sdu.edu.cn](mailto:zmw@sdu.edu.cn)

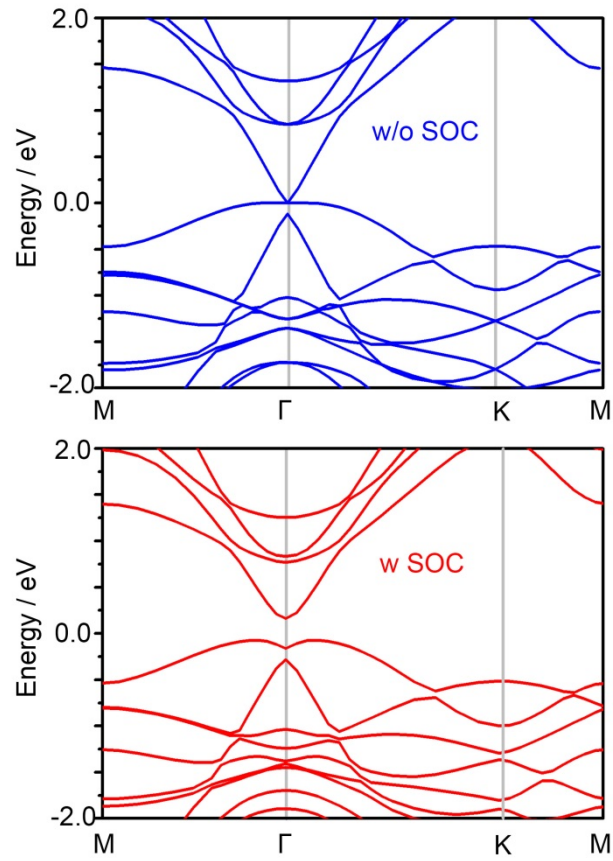

**Figure S1.** Electronic band structures of DB Sn<sub>6</sub>Ge<sub>4</sub>H<sub>4</sub> without (up panel) and with (down panel) SOC obtained by using a hybrid functional in the form of Heyd–Scuseria–Ernzerhof (HSE). A small tensile strain (~2%) was applied to the lattice. The energy at the Fermi level was set to zero.

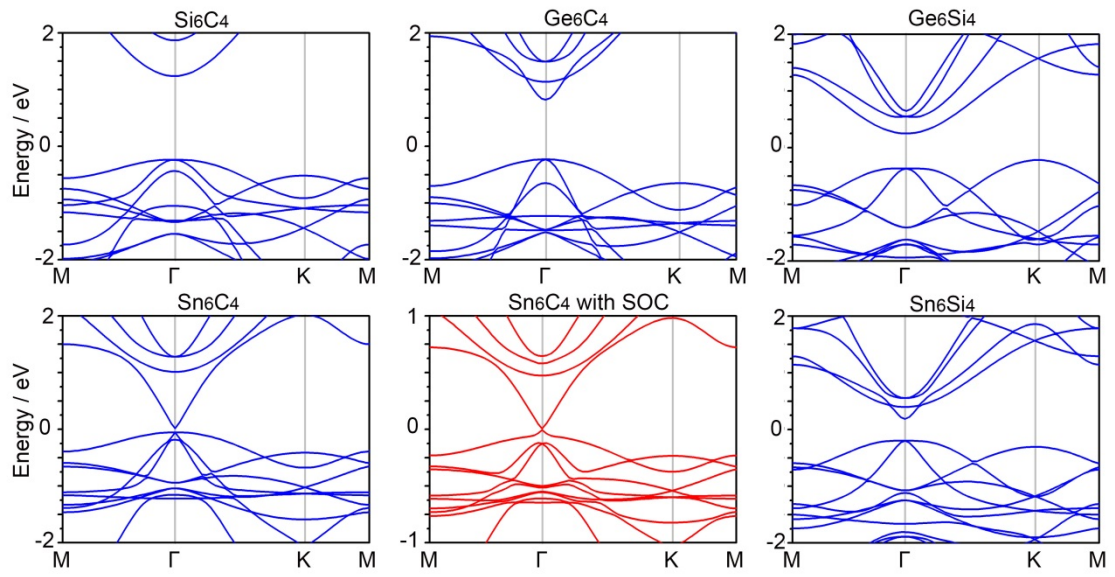

**Figure S2.** Electronic band structures of group-IV binary compounds with DB configurations. The blue lines indicate the bands without SOC. For DB  $\text{Sn}_6\text{C}_4$ , the band structure with SOC (the red lines) was plotted. Obviously, it is not a QSH insulator.

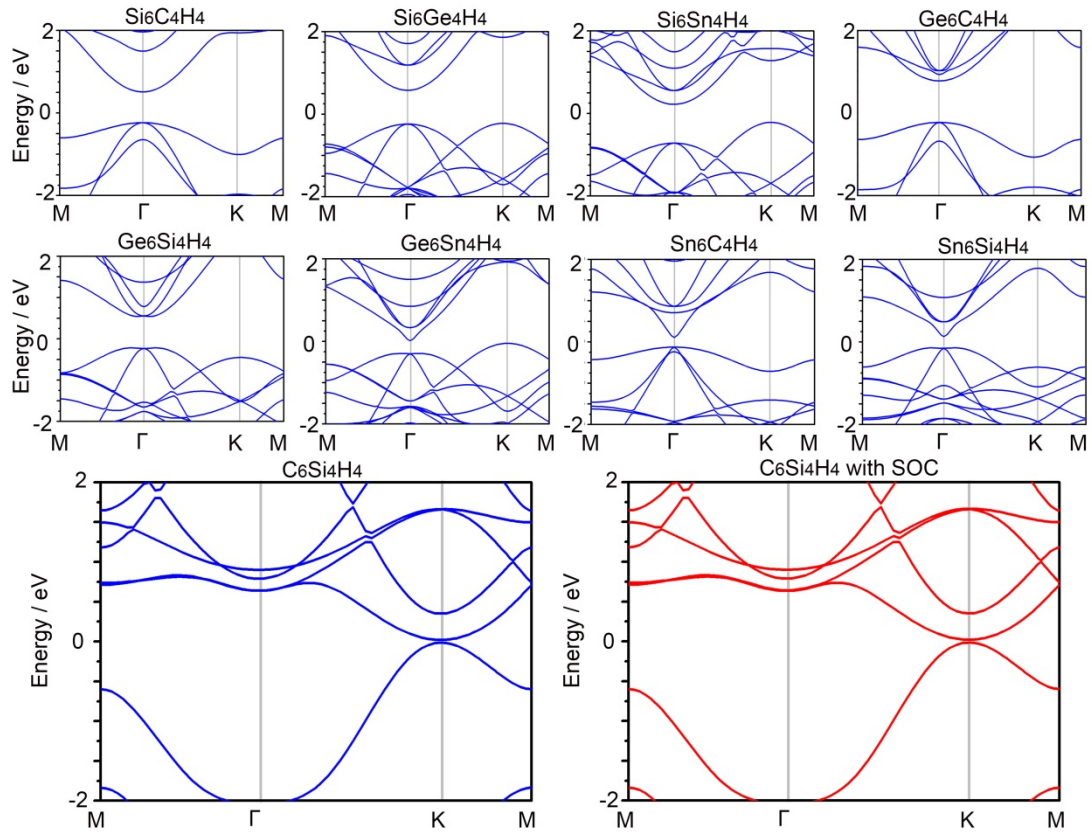

**Figure S3.** Electronic band structures of hydrogenated group-IV binary compounds with DB configurations. The blue lines indicate the bands without SOC. For DB  $C_6Si_4H_4$ , the band structure with SOC (the red lines) was plotted. Obviously, it is not a QSH insulator. Obviously, s-p band inversion doesn't take place in these band structures and none of them are QSH insulators.
